# Supplementary material for: Knockdown of ketohexokinase versus inhibition of its kinase activity exert divergent effects on fructose metabolism
Source: PubMed Central journal article supplement (PMC11623947; doi:10.1172/jci.insight.184396), 2024-12-06

Figure 2I

T-KHK

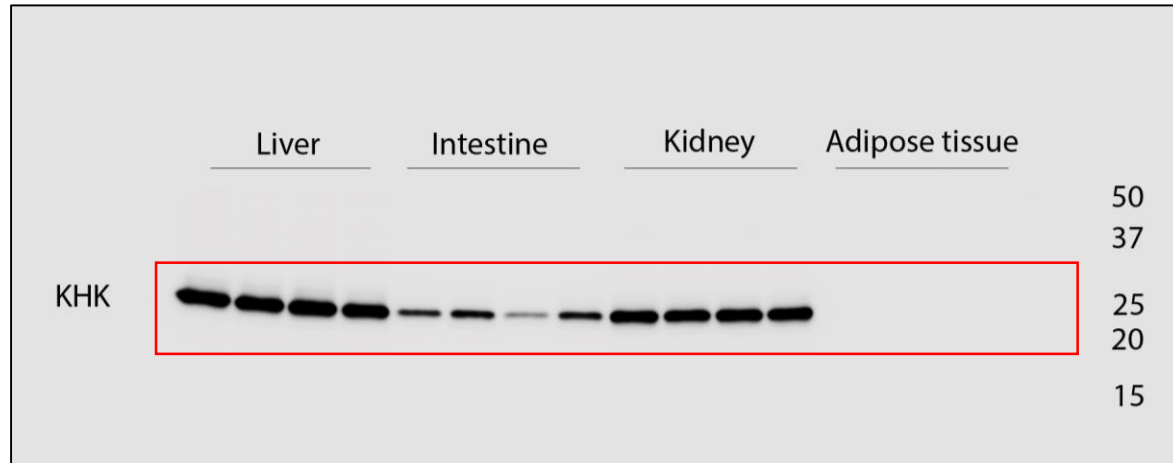

KHK-C

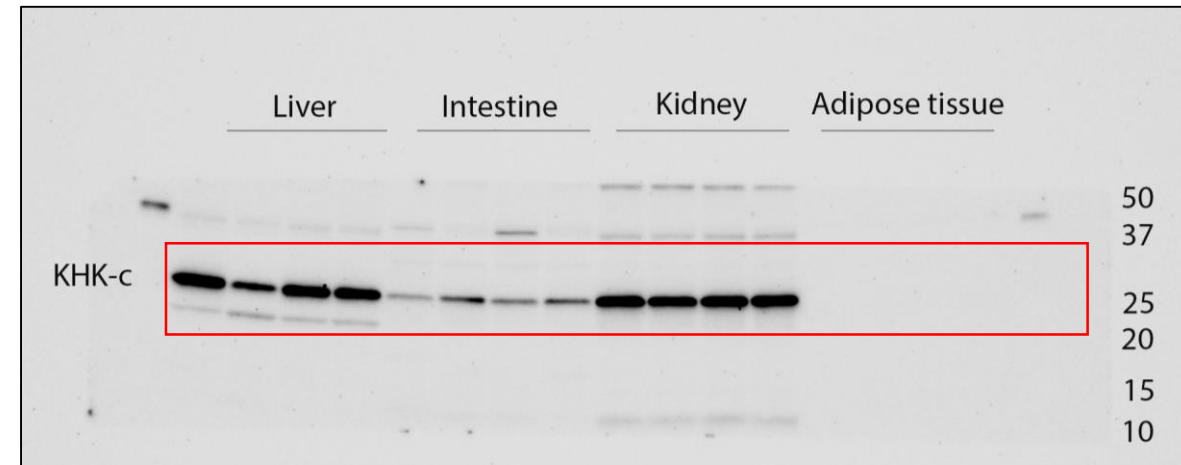

ACTIN

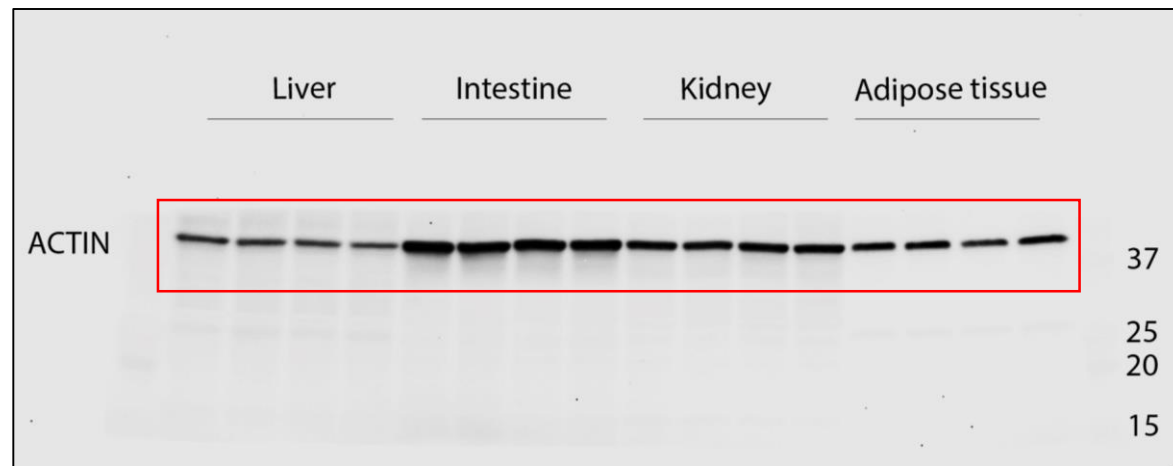

Figure 3C

### KHK-C

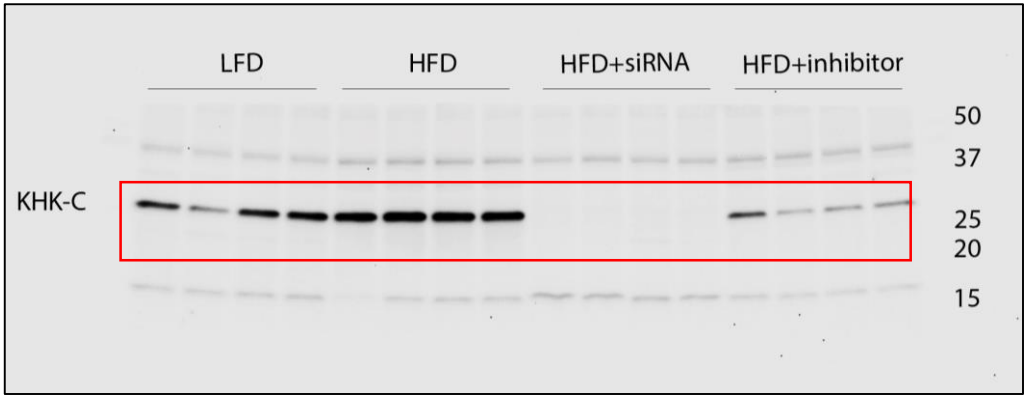

### ALDOB

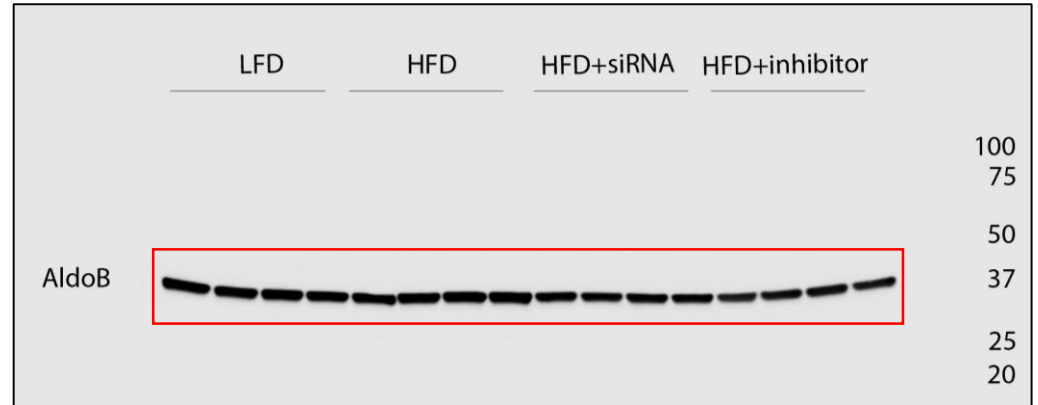

### TKFC

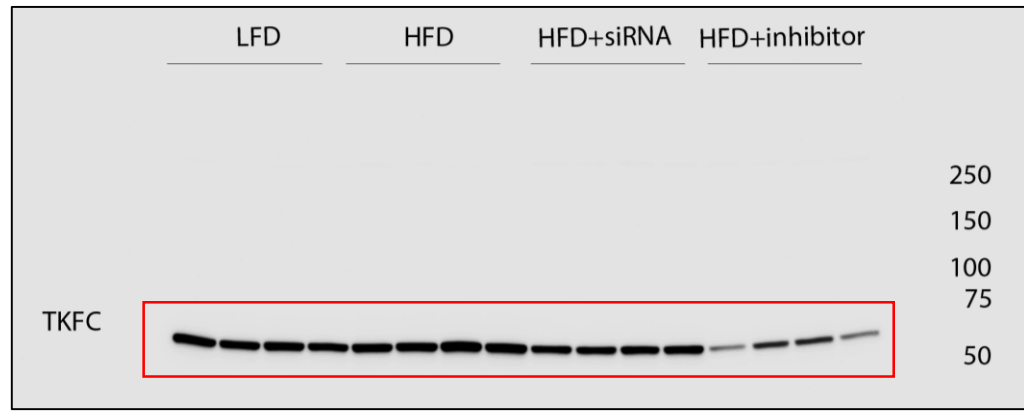

### ADH1

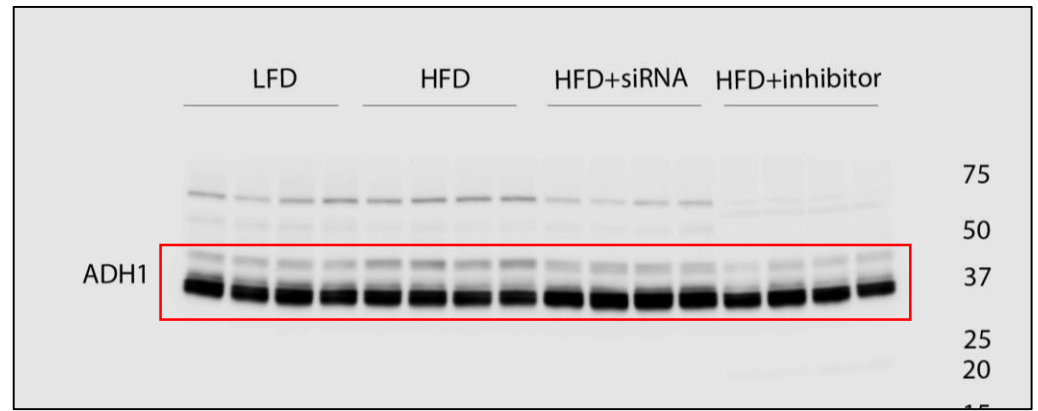

### ALDH3

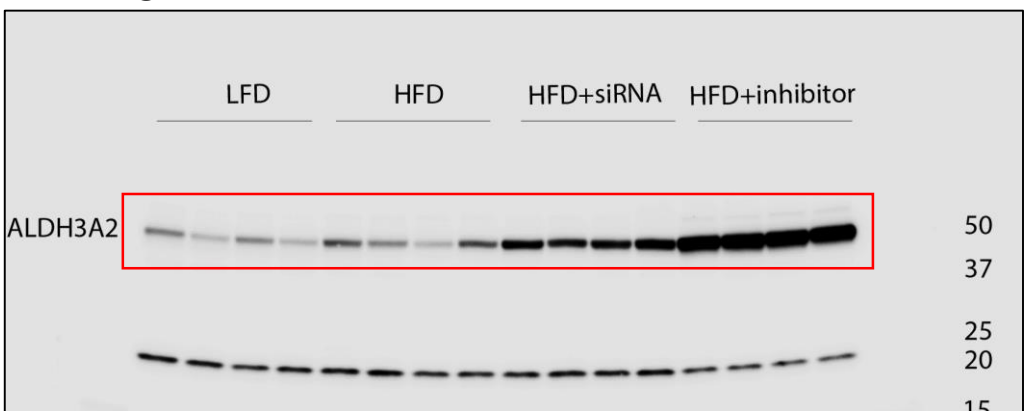

### VINC

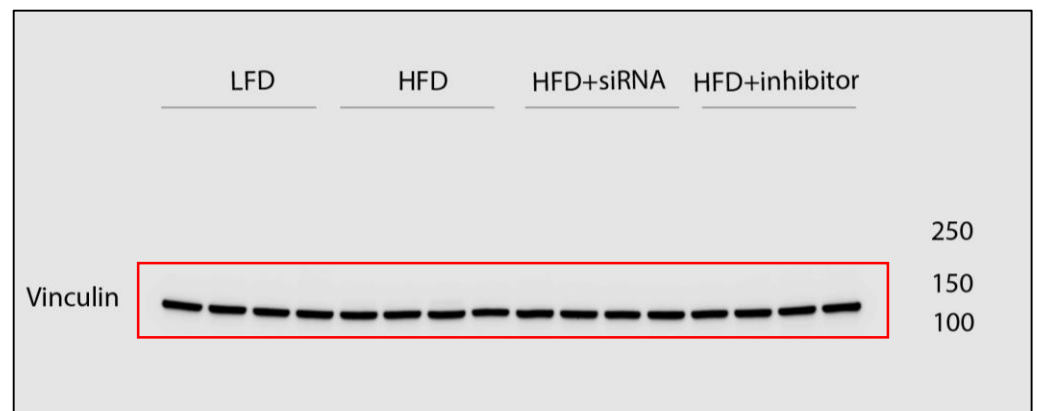

Figure 3F

HK1

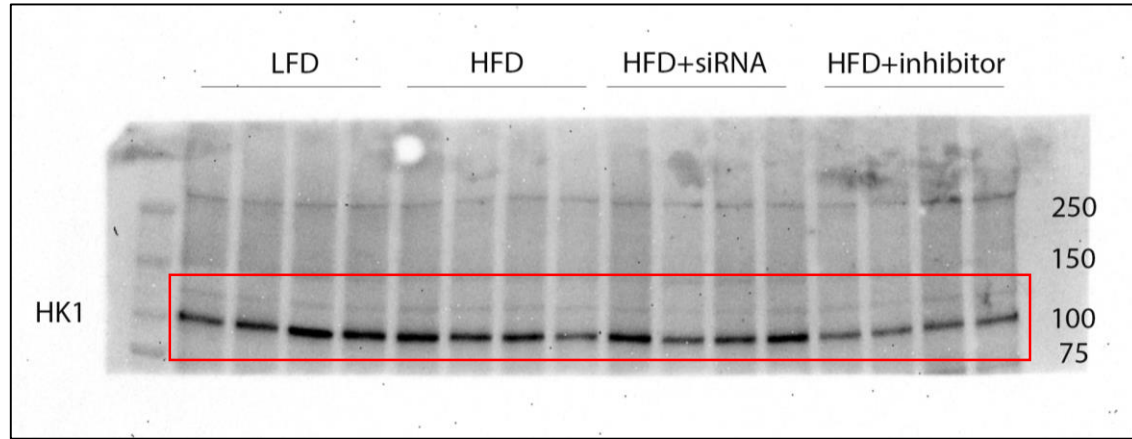

HK2

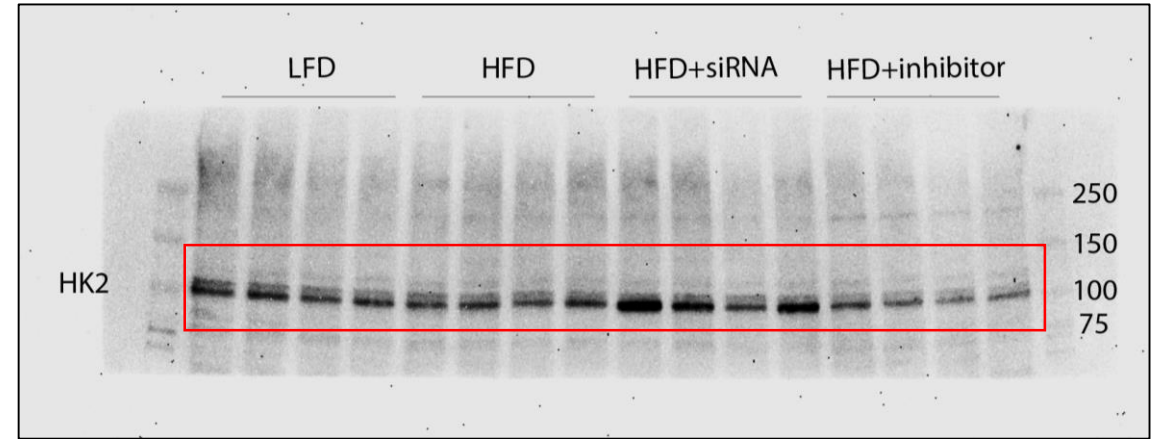

HK3

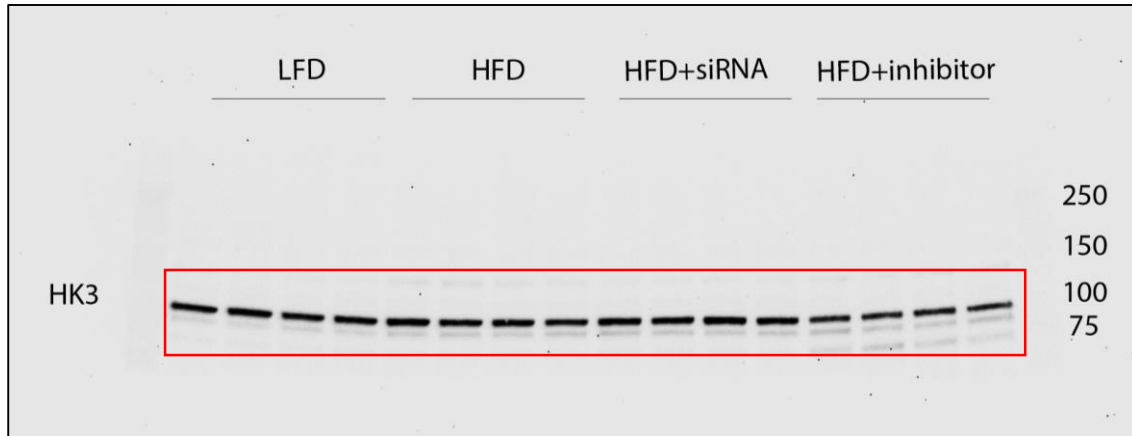

ACTIN

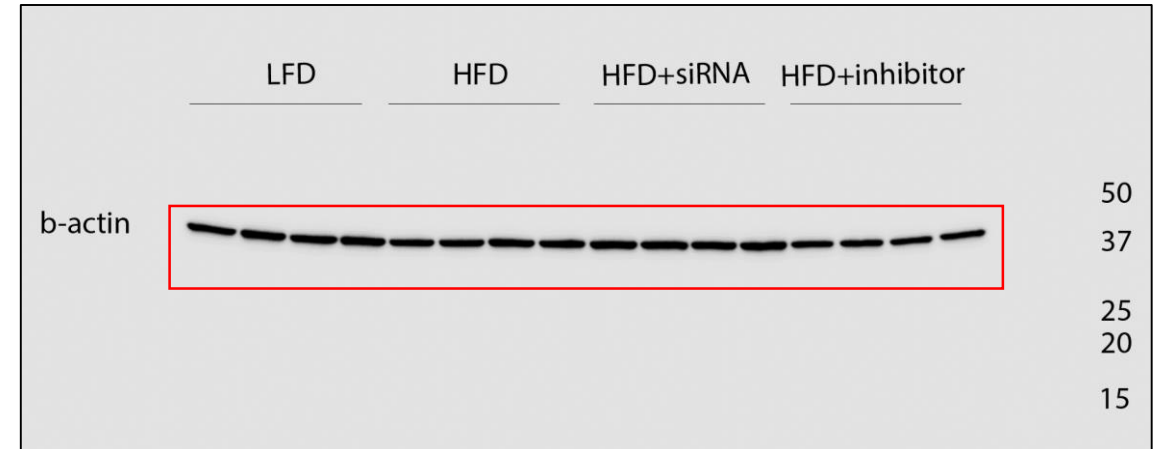

Figure 4F

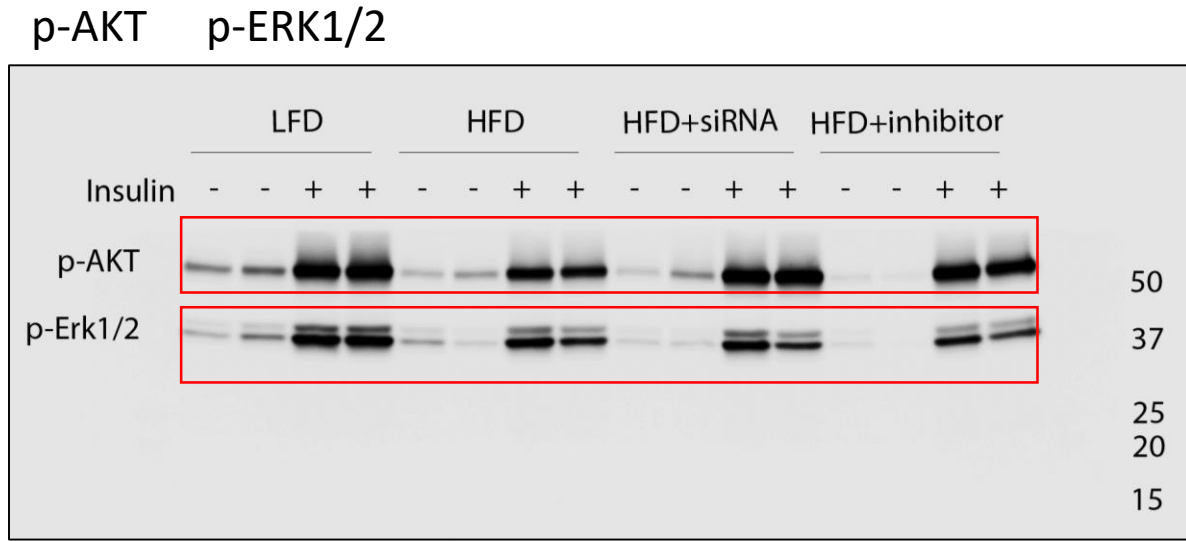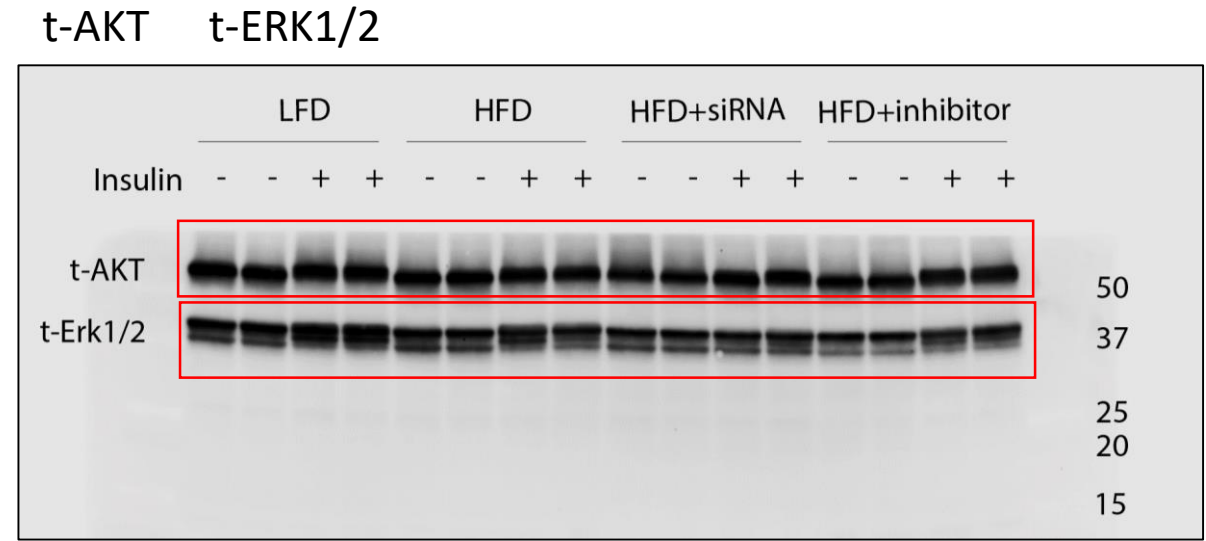

Figure 4G

### GAPDH

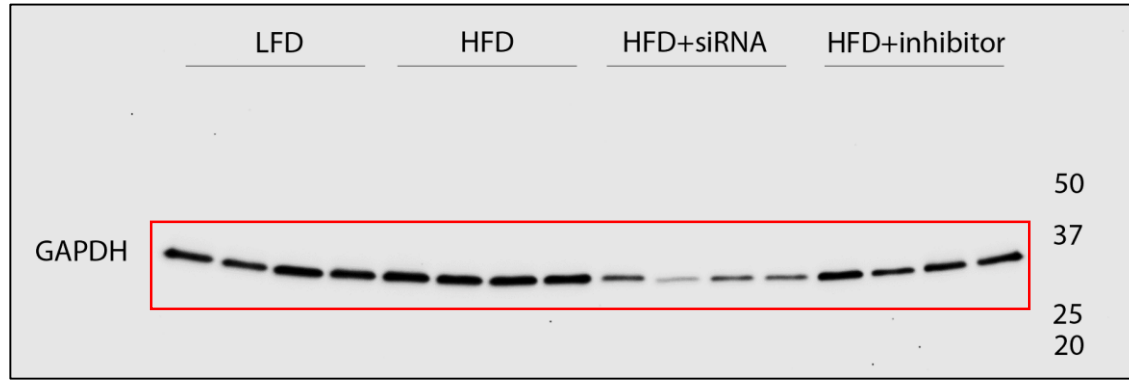

### PKM1/2

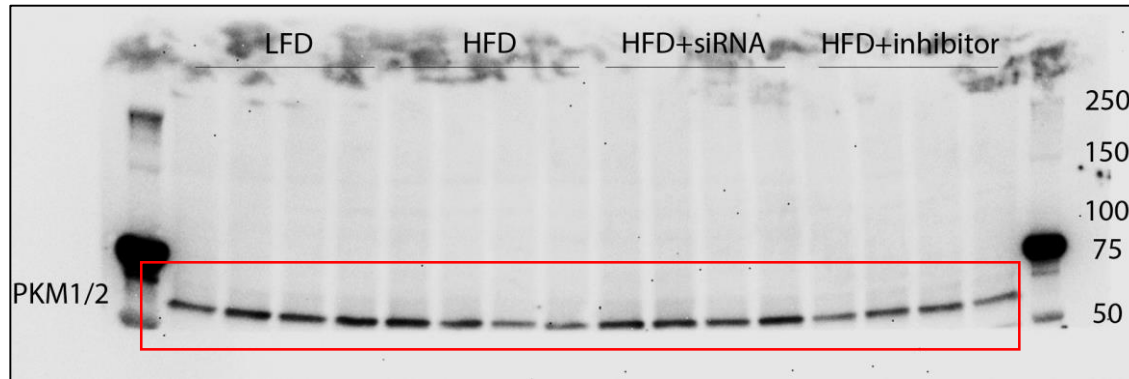

### ACTIN

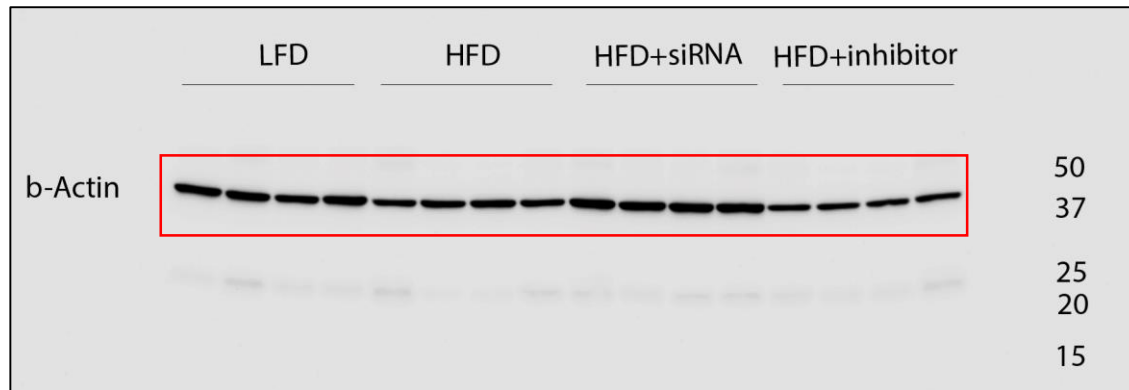

### PFKP

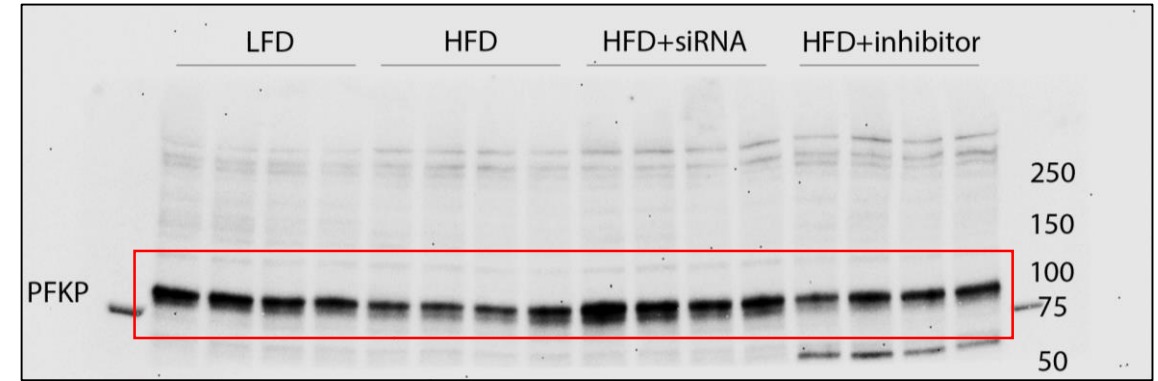

### PDH

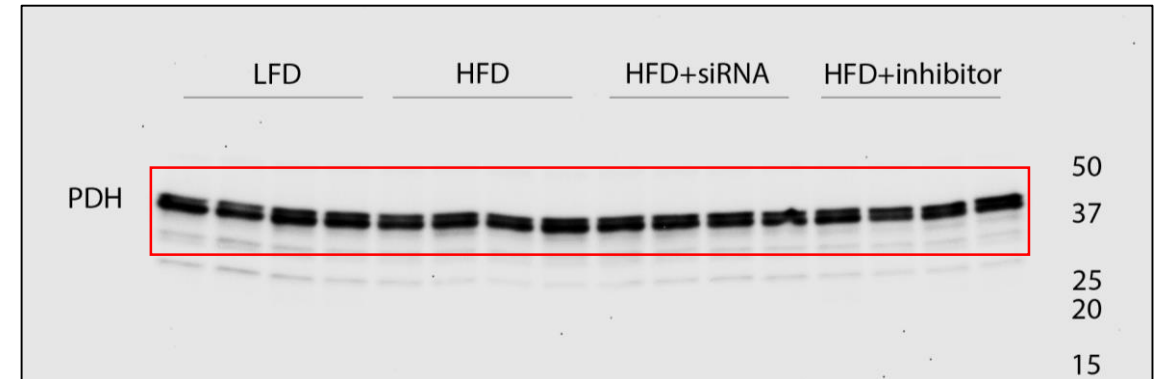

Figure 6C

### ChREBP

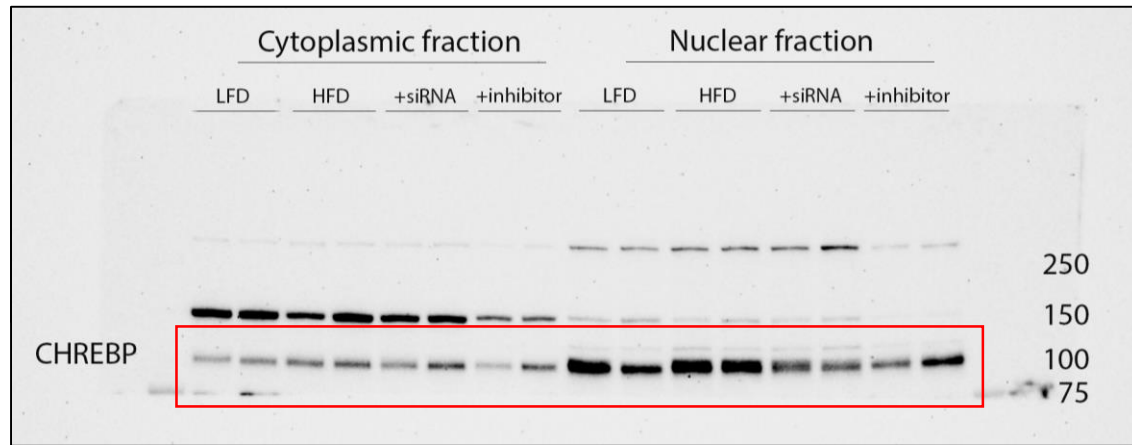

### SREBP1

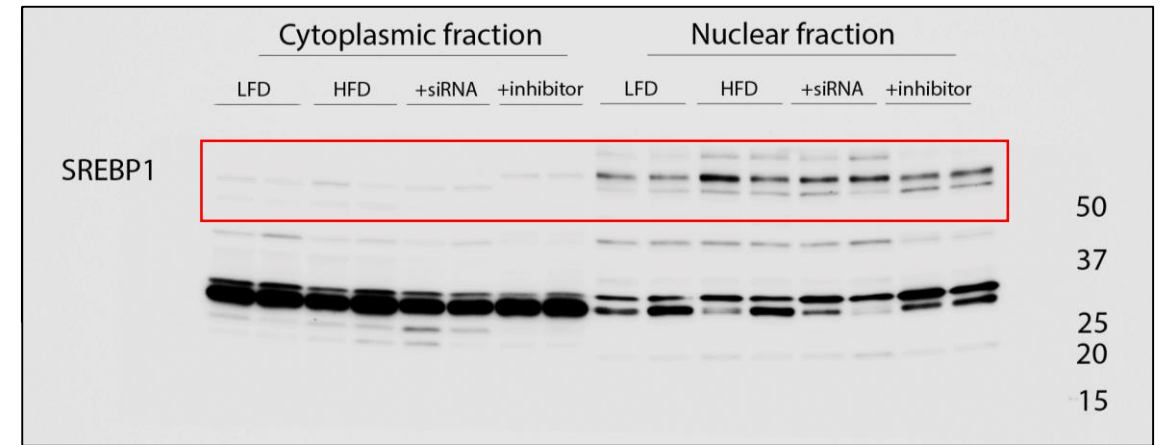

### LAMIN A/C

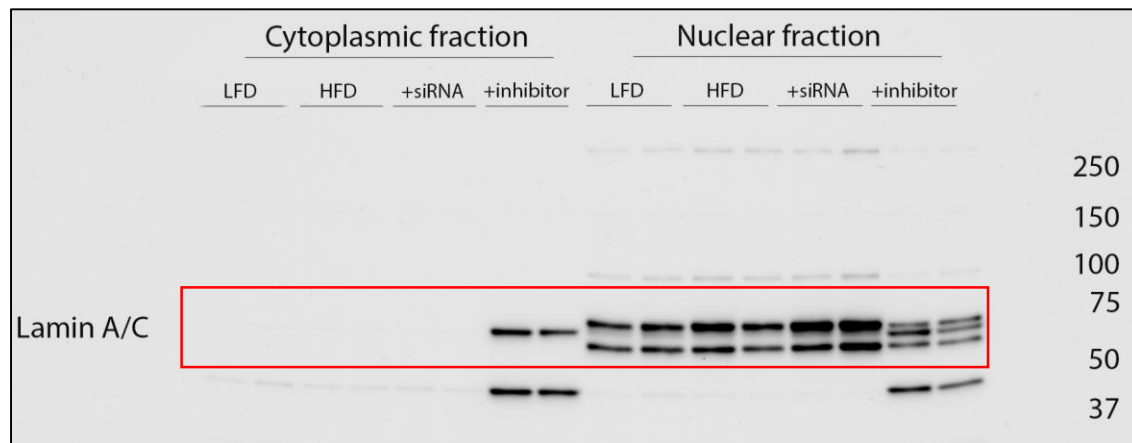

### GAPDH

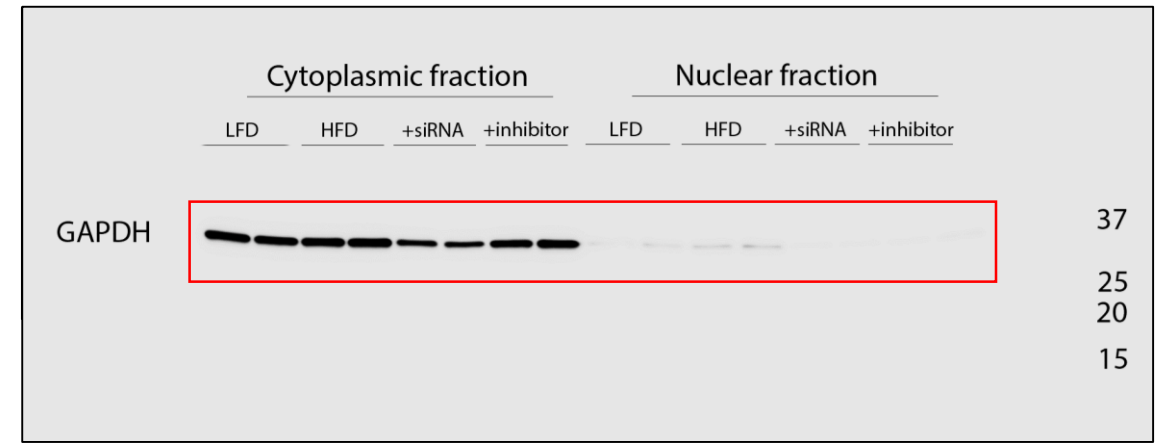

Figure 6E

### ACLY

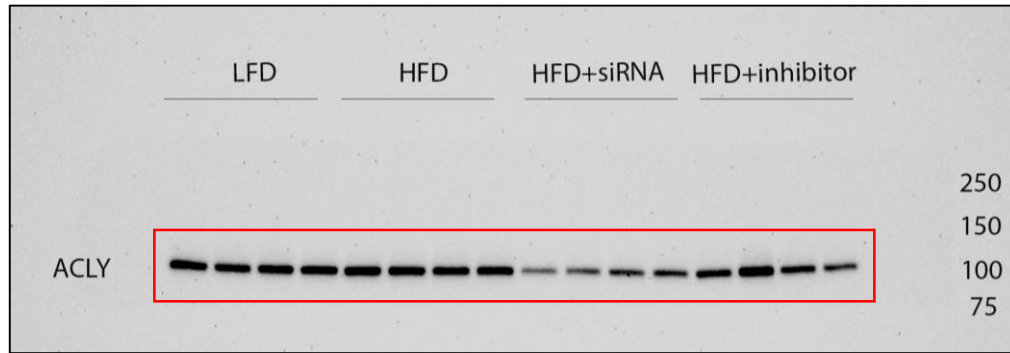

### ACC1

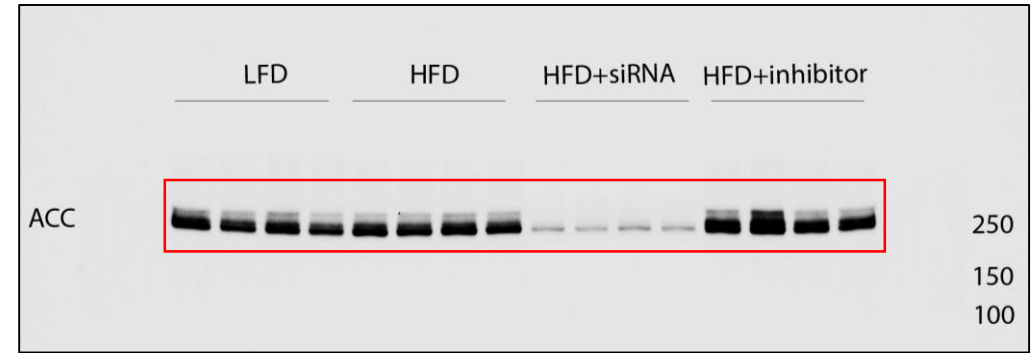

### TKFC

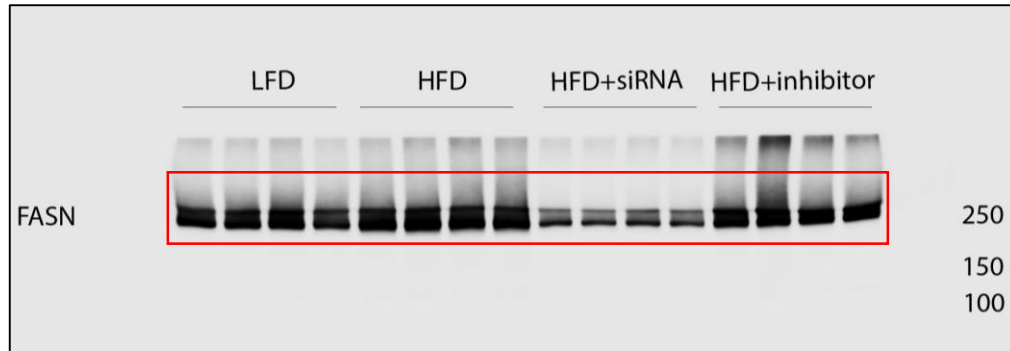

### ADH1

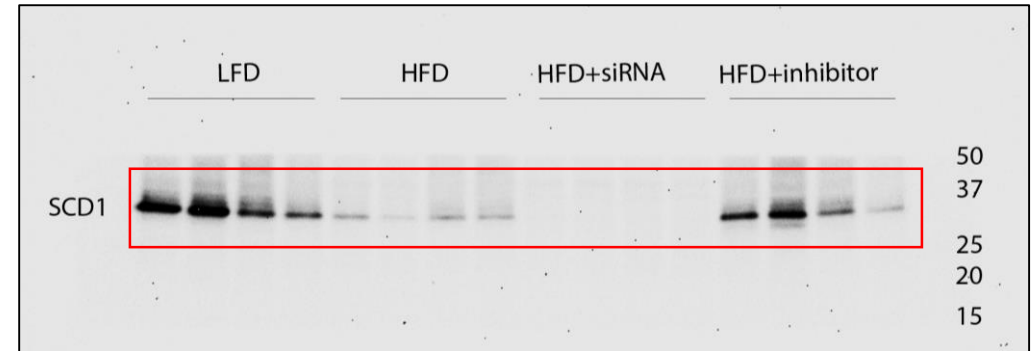

### VINC

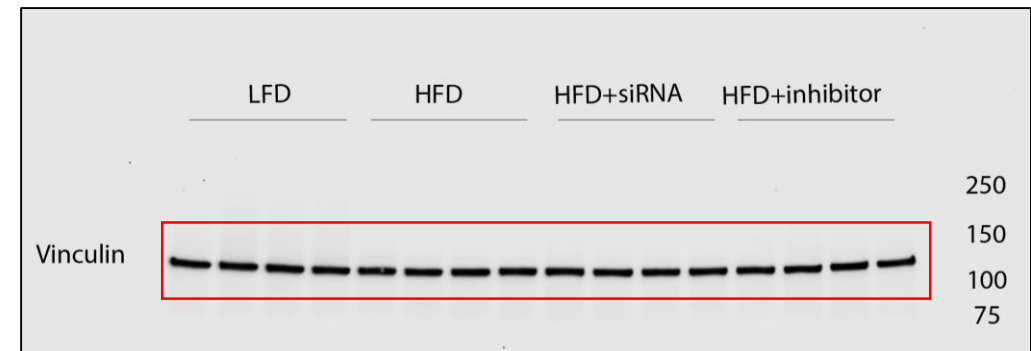

Figure 6F

### CPT1a

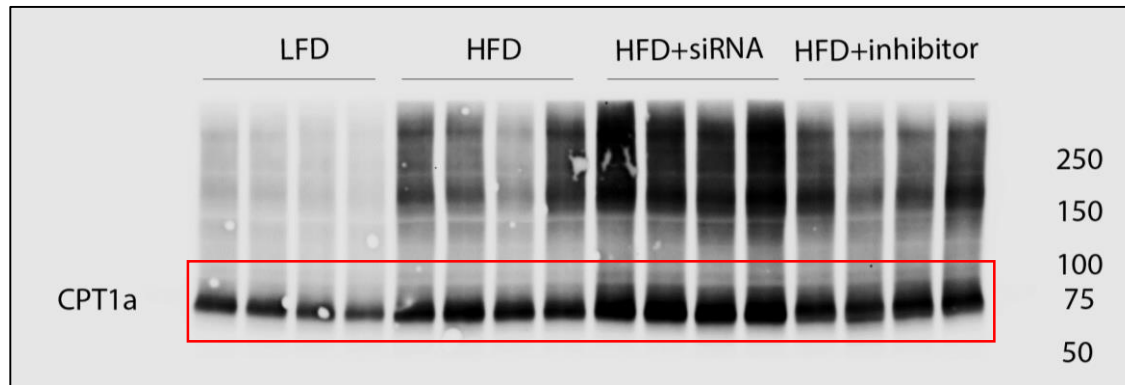

### ACADVL

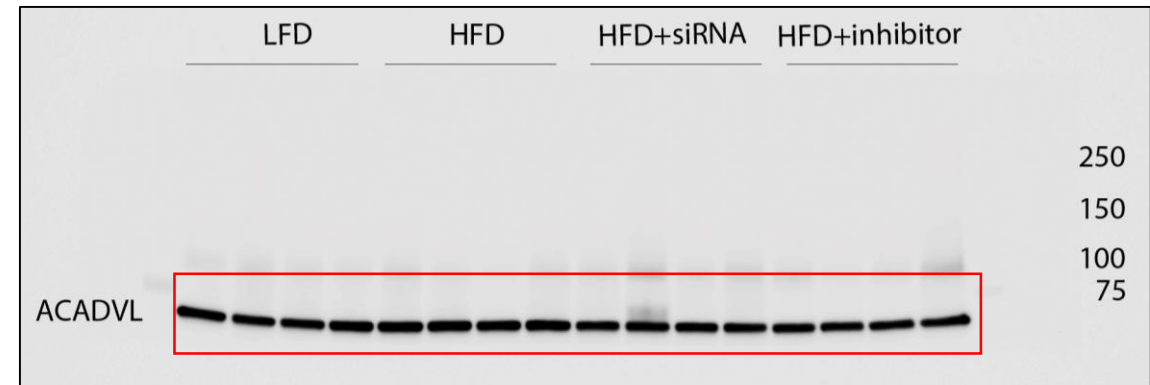

### ACADL

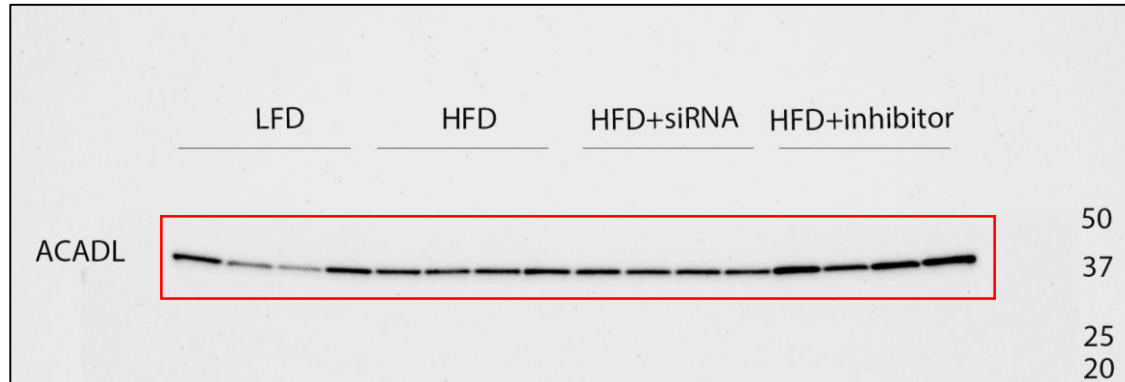

### HADHA

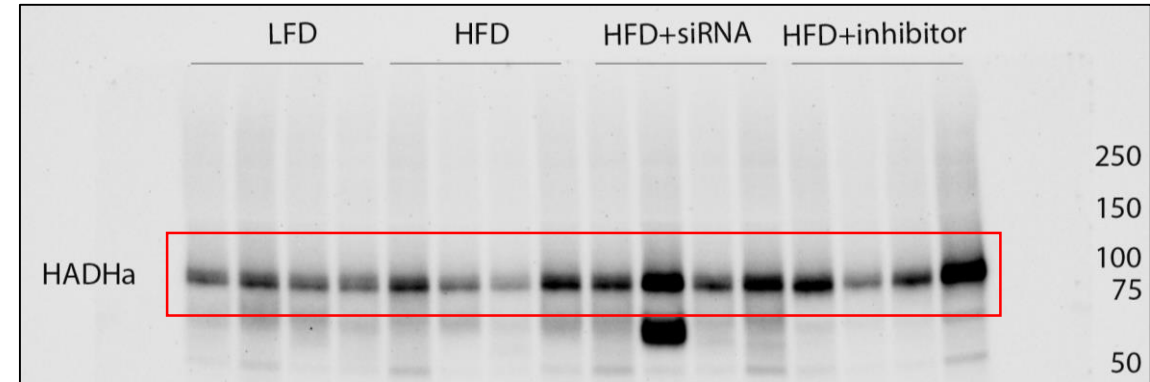

### VINC

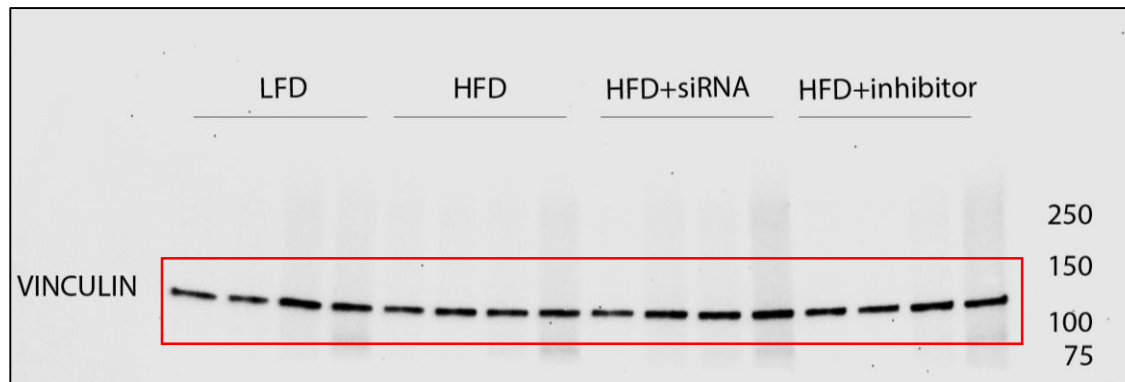



Figure 6H

### ABCD2

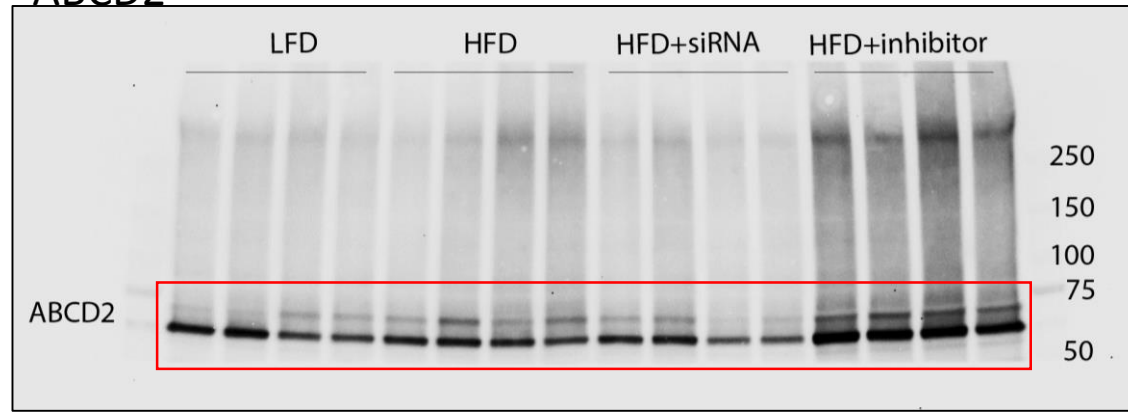

### ACSL1

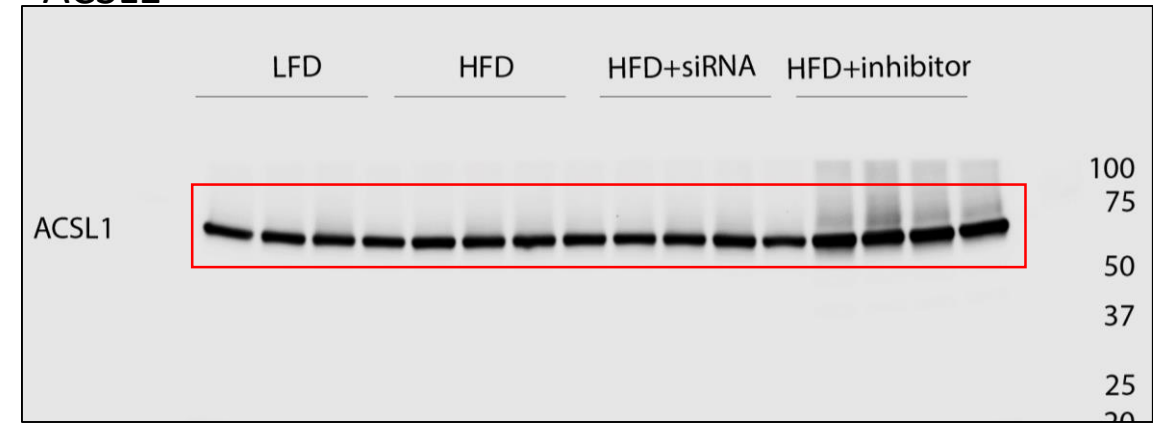

### ACOX1

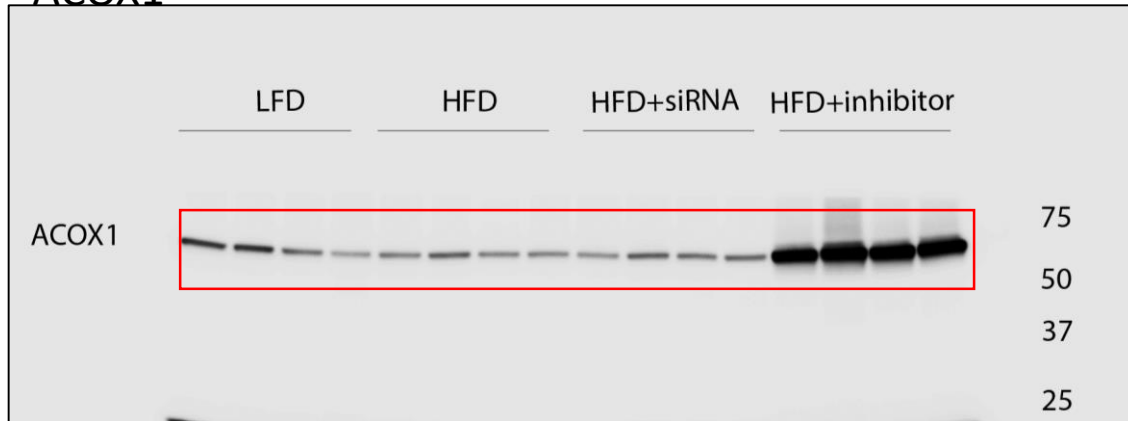

### ACOT1

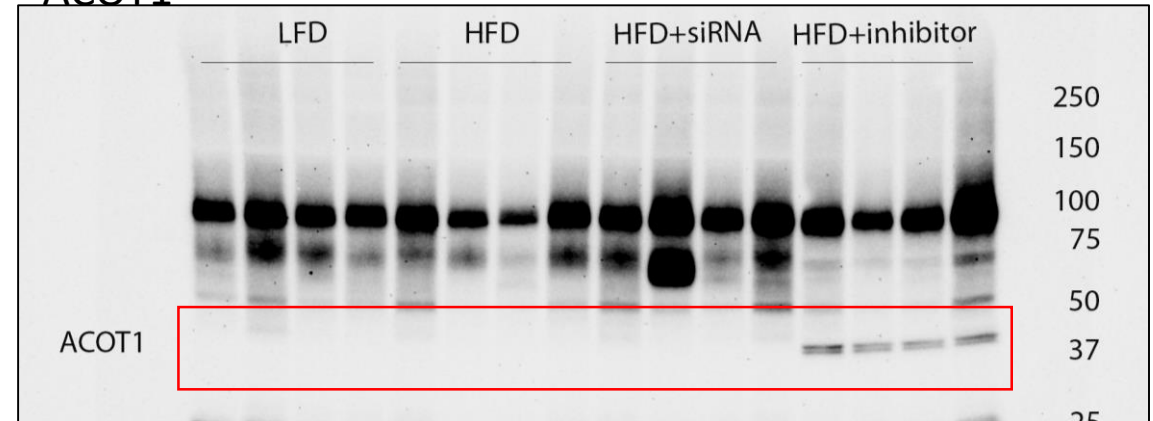

### VINC

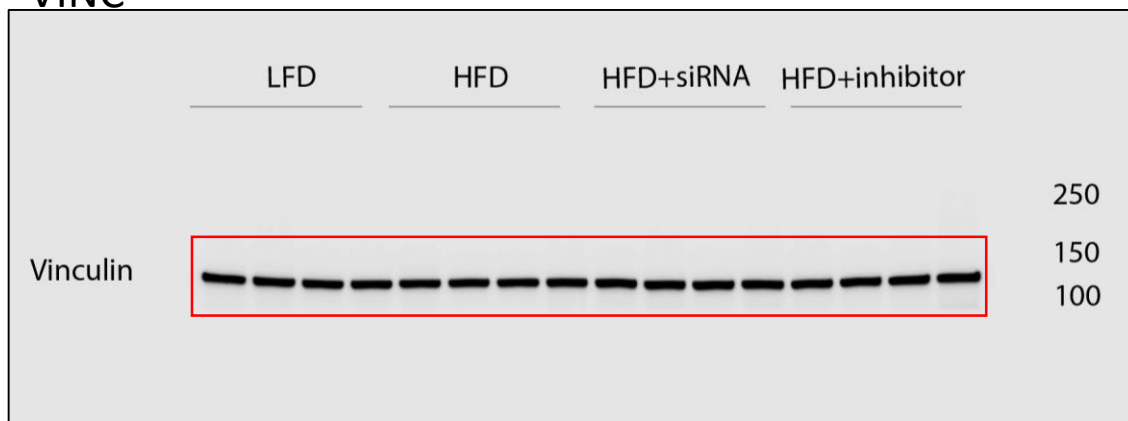

Figure 7B

### GFP-KHK-C, KHK-C

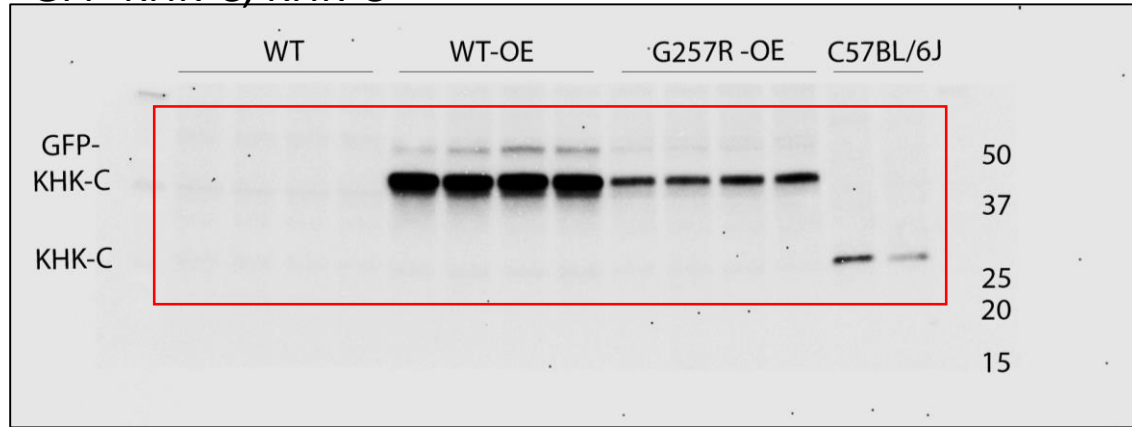

### ALDOB

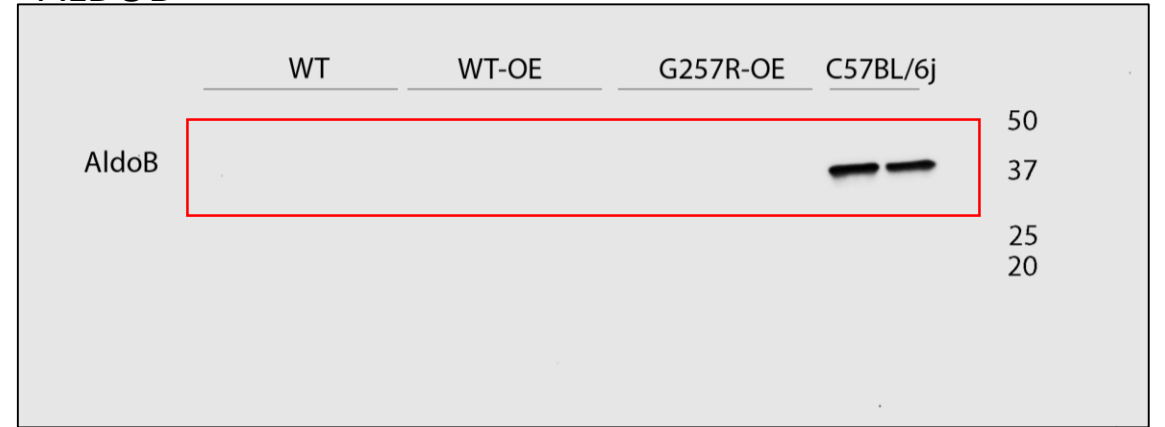

### TKFC

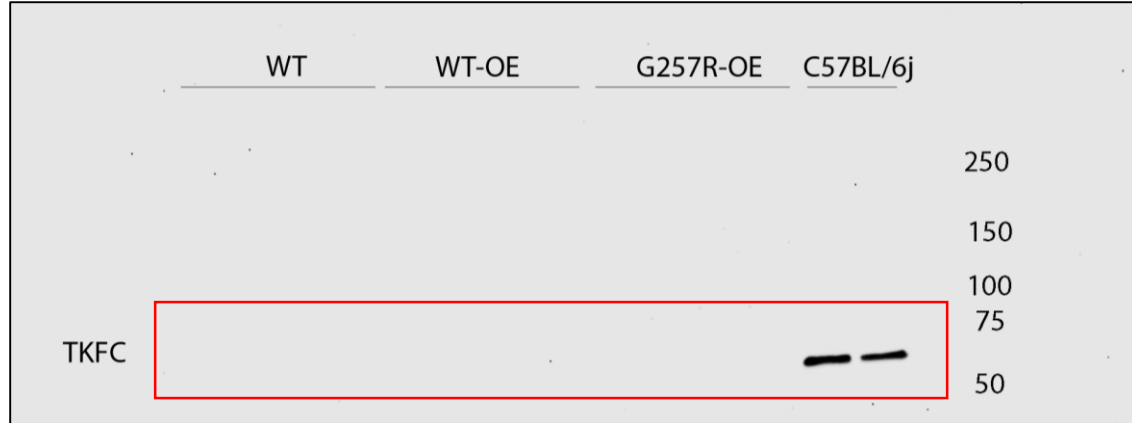

### VINC

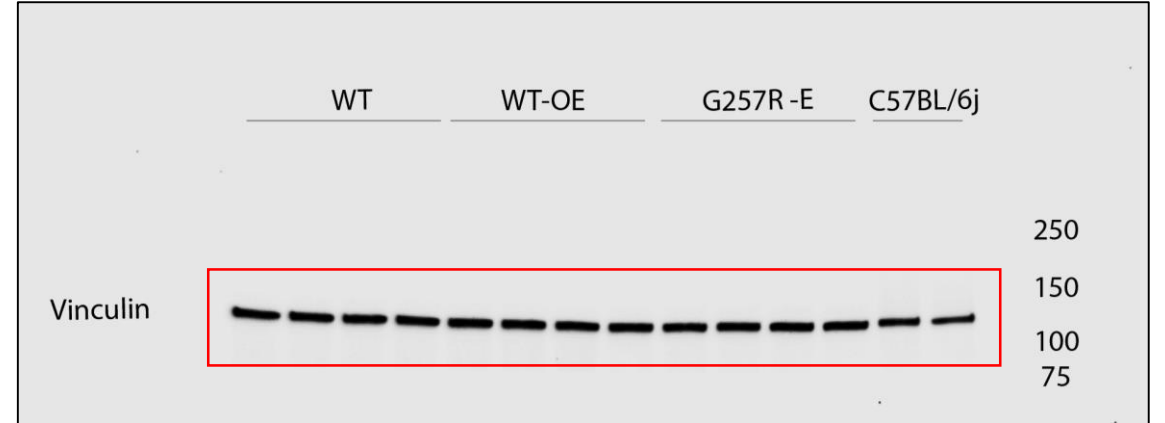

Figure 7K

### GCK

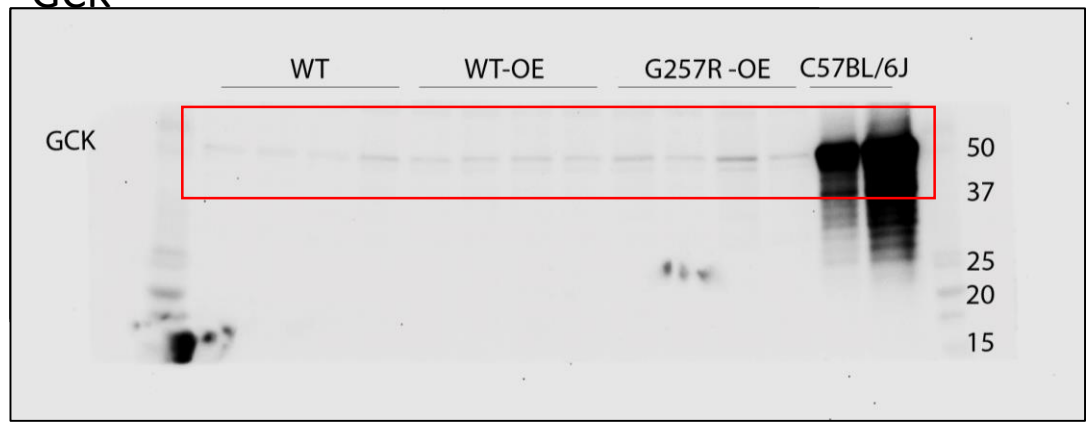

### HK1

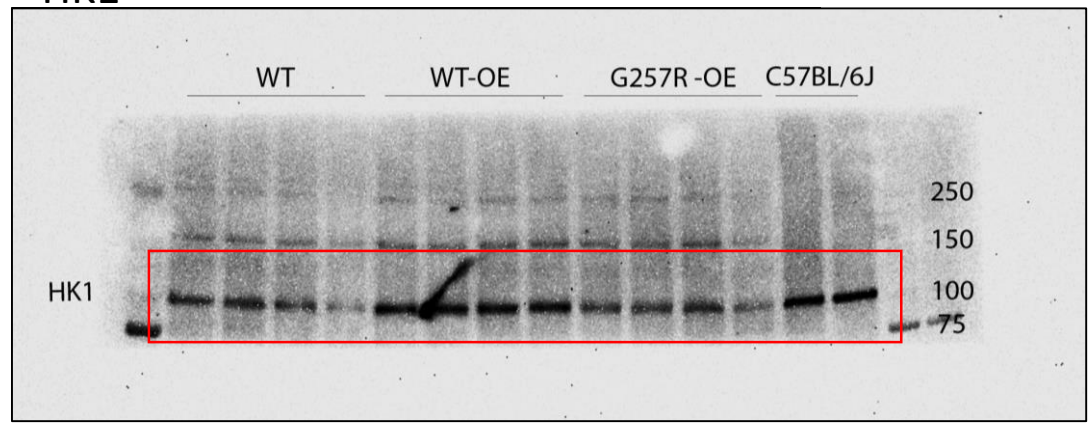

### HK2

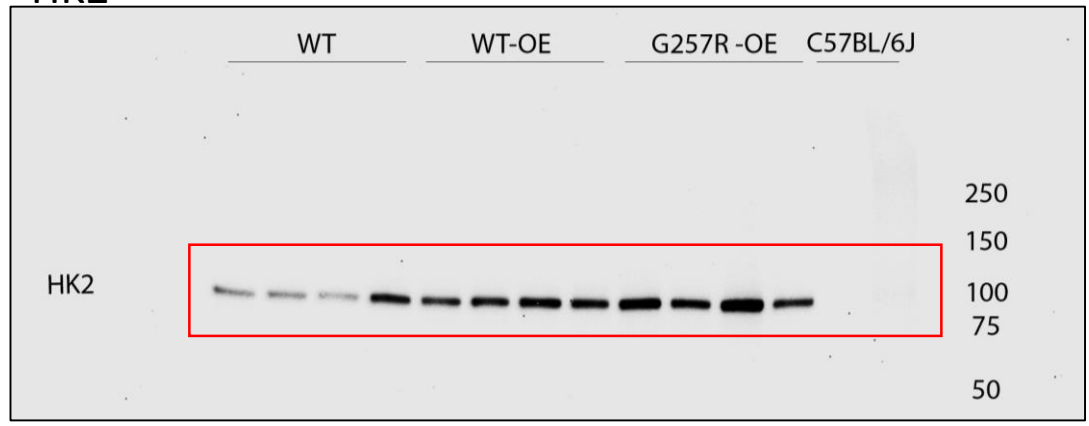

### HK3

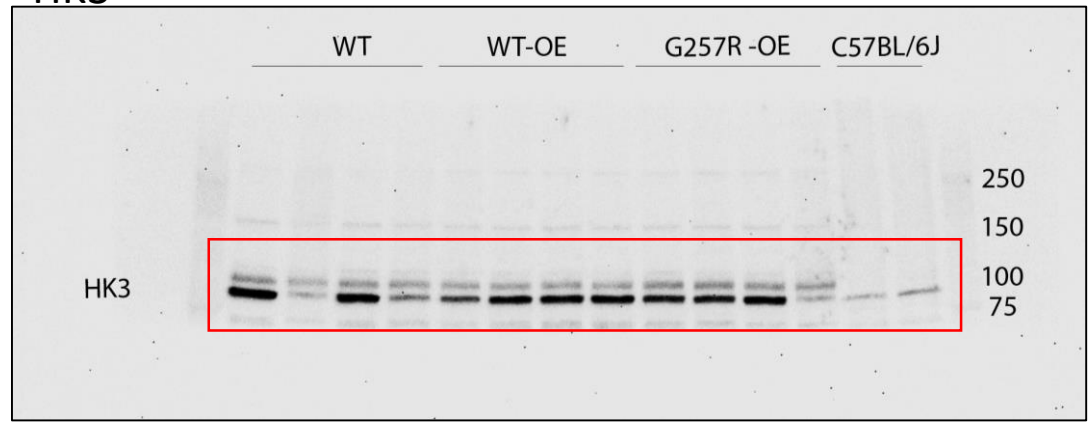

### GAPDH

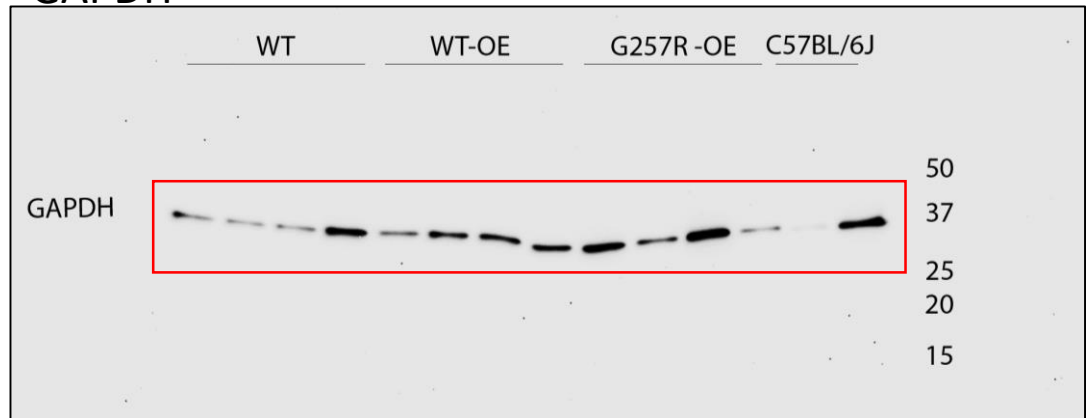

### VINC

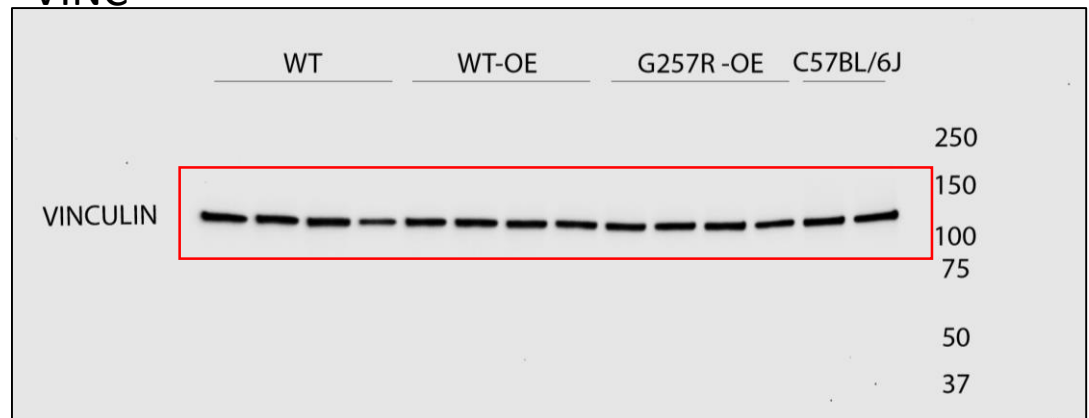

### KHK-C

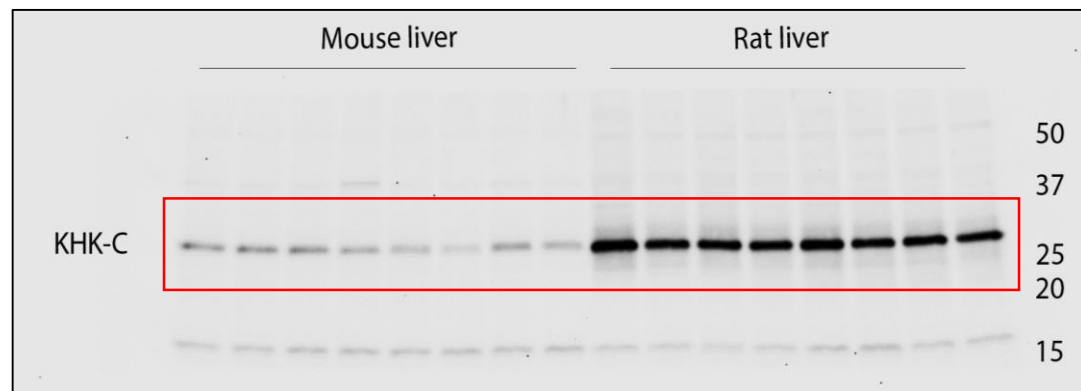

### VINC

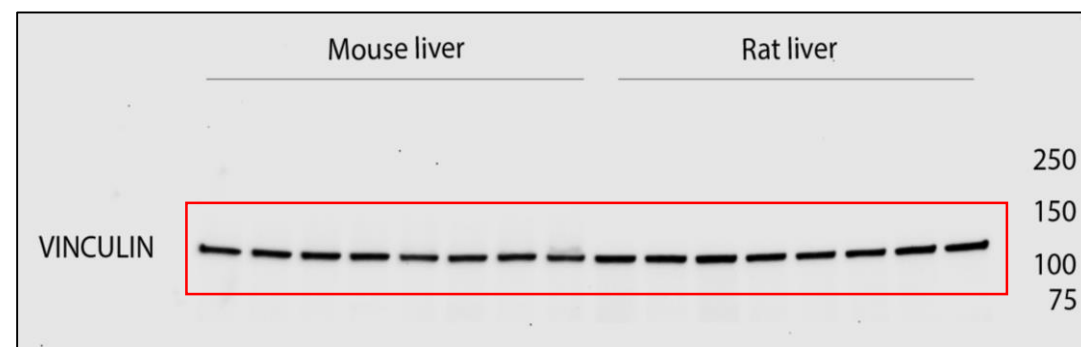

KHK-C

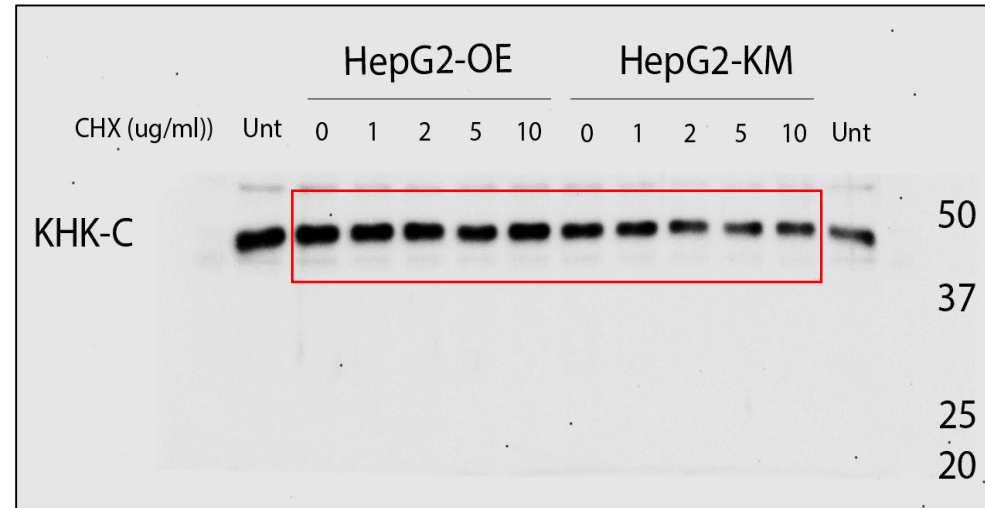

ACTIN

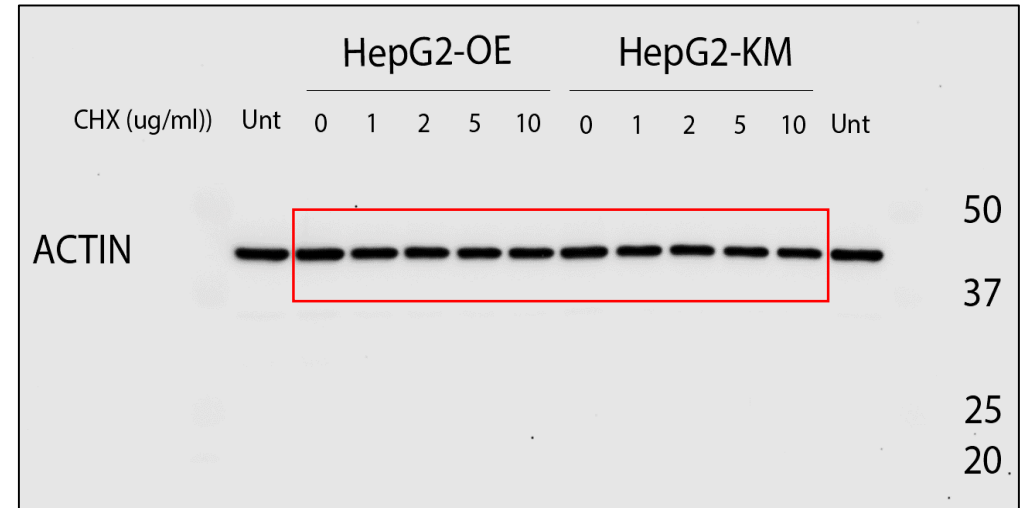

Supplement: jciinsight-9-184396-s171.pdf [file jciinsight-9-184396-s171.pdf]
